# Supplementary material for: Food Insecurity and Micronutrient Status among Ghanaian Women Planning to Become Pregnant
Source: PubMed Central journal article supplement (PMC7071299; doi:10.3390/nu12020470), 2020-02-13
Supplement: nutrients-12-00470-s001.pdf [file nutrients-12-00470-s001.pdf]

**Supplementary Materials:**

Table S1: Food Security Questionnaire.

|    |                                                                                                                                           | Yes                   | No                    | Don't know            | Refused               |
|----|-------------------------------------------------------------------------------------------------------------------------------------------|-----------------------|-----------------------|-----------------------|-----------------------|
| 1. | During the last month, were you worried that your household would run out of food because of lack of money or other resource to get food? | <input type="radio"/> | <input type="radio"/> | <input type="radio"/> | <input type="radio"/> |
| 2. | During the last month, did your household run out of food because of lack of money or other resource to get food?                         | <input type="radio"/> | <input type="radio"/> | <input type="radio"/> | <input type="radio"/> |
| 3. | During the last month, did your household lack enough money or other resource to get healthy and nutritious food?                         | <input type="radio"/> | <input type="radio"/> | <input type="radio"/> | <input type="radio"/> |

The next 5 questions ask about adults in the household, referring to persons over 18 years of age.

|    |                                                                                                                                                                                        | Yes                   | No                    | Don't know            | Refused               |
|----|----------------------------------------------------------------------------------------------------------------------------------------------------------------------------------------|-----------------------|-----------------------|-----------------------|-----------------------|
| 4. | During the last month, did you or any adult in your household have to consume a diet based on only few kinds of foods because of lack of money or other resources to get food?         | <input type="radio"/> | <input type="radio"/> | <input type="radio"/> | <input type="radio"/> |
| 5. | During the last month, did you or any adult in your household not eat breakfast, lunch or dinner [or skip a meal] because of lack of money or other resources to get food?             | <input type="radio"/> | <input type="radio"/> | <input type="radio"/> | <input type="radio"/> |
| 6. | During the last month, did you or any adult in your household eat less than you thought you should because of lack of money or other resources to get food?                            | <input type="radio"/> | <input type="radio"/> | <input type="radio"/> | <input type="radio"/> |
| 7. | During the last month, did you or any adult in your household feel hungry but did not eat because of lack of money or other resources to get food?                                     | <input type="radio"/> | <input type="radio"/> | <input type="radio"/> | <input type="radio"/> |
| 8. | During the last month, did you or any adult in your household eat only one meal in a day or go without eating for a whole day because of lack of money or other resources to get food? | <input type="radio"/> | <input type="radio"/> | <input type="radio"/> | <input type="radio"/> |
